# Supplementary material for: Impact of buildings on surface solar radiation over urban Beijing
Source: Copernicus journal article supplement (doi:10.5194/acp-16-5841-2016), 2016-05-12
Supplement: Supplementary file 1 [file acp-16-5841-2016-supplement.pdf]

Supplement of Atmos. Chem. Phys., 16, 5841–5852, 2016  
<http://www.atmos-chem-phys.net/16/5841/2016/>  
doi:10.5194/acp-16-5841-2016-supplement  
© Author(s) 2016. CC Attribution 3.0 License.

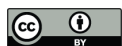

Atmospheric  
Chemistry  
and Physics  
Open Access  
EGU

*Supplement of*

## **Impact of buildings on surface solar radiation over urban Beijing**

**Bin Zhao et al.**

*Correspondence to:* Bin Zhao (zhaob1206@gmail.com)

The copyright of individual parts of the supplement might differ from the CC-BY 3.0 licence.

## 1 **1 Evaluation of compatibility of the 3-D radiation parameterization associated** 2 **with spatial resolutions**

3 We evaluate the compatibility of the 3-D radiation parameterization associated with spatial  
4 resolutions. We first calculate surface solar flux deviations from the horizontal surface in each  
5  $4 \times 4 \text{ km}^2$  grid and  $800 \times 800 \text{ m}^2$  grid with the 3-D radiation parameterization. Then, we  
6 compare flux deviations in each  $4 \times 4 \text{ km}^2$  grid and the summation of all  $800 \times 800 \text{ m}^2$  grids  
7 within the former. We select four  $4 \times 4 \text{ km}^2$  grids (marked by red dashed rectangle in Fig. 1) to  
8 perform this evaluation, which exactly correspond to the whole Domain 2. The evaluation is  
9 performed for daily average flux deviations on April 1<sup>st</sup> and hourly flux deviations at selected  
10 times (7:00, 12:00, and 17:00 BT). The simulation results are summarized in Table S1. Here  
11 Grids 1, 2, 3, and 4 represent the upper-left, upper-right, lower-left, and lower-right grids,  
12 respectively.

13 Table S1 shows that biases between flux deviations calculated directly from 4 km grids and  
14 those from the summation of 800 m grids are within  $\pm 0.025 \text{ W m}^{-2}$  for all grids and simulation  
15 periods, illustrating a reasonable compatibility between different grid resolutions.

## 16 **2 Configuration of the WRF/CMAQ modelling system**

17 For WRF/CMAQ simulations, we apply one-way, triple nesting domains, as shown in Fig. S1.  
18 Domain 1 covers China and part of East Asia and Southeast Asia at a grid resolution of  $36 \text{ km}$   
19  $\times 36 \text{ km}$ ; Domain 2 covers the eastern China at a grid resolution of  $12 \text{ km} \times 12 \text{ km}$ ; Domain 3  
20 covers the provinces of Beijing, Tianjin, and Hebei at a grid resolution of  $4 \text{ km} \times 4 \text{ km}$ . We  
21 note that Domain 1 used in 3-D radiative transfer calculations is a part of Domain 3 that was  
22 used in WRF/CMAQ simulations, as illustrated in Fig. S1. CMAQ is configured using the  
23 AERO6 aerosol module and the CB-05 gas-phase chemical mechanism. WRFv3.3 is used to  
24 generate meteorological fields. The National Center for Environmental Prediction (NCEP)'s  
25 Final Operational Global Analysis data are used to generate the first guess field with a  
26 horizontal resolution of  $1^\circ \times 1^\circ$  at every 6 h. The NCEP's Automated Data Processing (ADP)  
27 data are used in the objective analysis scheme. The physics options selected in the WRF  
28 model are the Kain Fritsch cumulus schemes, the Pleim-Xiu land surface model, the Pleim-  
29 Xiu planetary boundary layer scheme, the Morrison double-moment scheme for cloud  
30 microphysics, and the Rapid Radiative Transfer Model (RRTM) longwave and shortwave  
31 radiation scheme. We note that surface albedo is determined as a function of surface type, soil

1 moisture, and solar zenith angle in the Pleim-Xiu land surface model (Pleim and Xiu, 1995).  
2 The Meteorology-Chemistry Interface Processor (MCIP) version 3.6 is applied to process  
3 meteorological data into a format required by CMAQ. The geographical projection, the  
4 vertical resolution, and the initial and boundary conditions of WRF/CMAQ are consistent  
5 with our previous papers (Zhao et al., 2013a; Zhao et al., 2015).

6 A high-resolution anthropogenic emission inventory for the Beijing-Tianjin-Hebei region  
7 developed by Tsinghua University is used (unpublished). Briefly, emissions are calculated at  
8 city levels and then distributed into  $4 \times 4 \text{ km}^2$  grid cells using various spatial proxies at a  
9 resolution of  $1 \times 1 \text{ km}^2$  using the methodology described in Streets et al. (2003). A unit-based  
10 method is applied to estimate emissions from large point sources including coal-fired power  
11 plants, iron and steel plants, and cement plants (Lei et al., 2011; Zhao et al., 2008).  
12 Anthropogenic emissions for other regions in China are developed by Zhao et al. (2013a, b)  
13 and Wang et al. (2014) for 2010, and subsequently updated to 2012 considering changes of  
14 activity data and air pollution control technologies. Emissions for other Asian countries are  
15 compiled in the model inter-comparison program for Asia (MICS-Asia) phase III from a  
16 number of emission inventories. Biogenic emissions are calculated by the Model of Emissions  
17 of Gases and Aerosols from Nature (MEGAN, Guenther et al., 2006). The simulation periods  
18 include January, April, July, and October, 2012, representing four seasons.

### 19 **3 Evaluation of meteorological and chemical simulations**

#### 20 **3.1 Evaluation of meteorological variables**

21 In this study, meteorological parameters simulated by WRFv3.3 are compared with  
22 observations obtained from the National Climatic Data Center (NCDC,  
23 <http://www.ncdc.noaa.gov/>), where hourly or every third hour observations are available for  
24 28 sites scattered within Domain 3 used in WRF/CMAQ simulation (Fig. S1). Due to limited  
25 observational data available, statistical evaluation is restricted to temperature at 2 m, wind  
26 speed and wind direction at 10 m, and humidity at 2 m. The statistical indices used include the  
27 mean observation (Mean OBS), mean simulation (Mean SIM), bias, and gross error (GE). A  
28 detailed explanation of these indices can be found in Emery et al. (2001).

29 Table S2 lists the model performance statistics and benchmarks suggested by Emery et al.  
30 (2001). These benchmark values were derived based on performance statistics of the Fifth-  
31 Generation NCAR/Penn State Mesoscale Model (MM5) from a number of studies over the  
32 U.S. domain (mostly at grid resolutions of 12km or 4km), and have been widely accepted in

1 many regional air quality modeling studies. We expect these standards should also be  
2 applicable in this study, considering that similar models (MM5 vs WRF) and grid resolutions  
3 are applied. For the wind speed and humidity, all statistical indices are within the benchmark  
4 range. For the temperature, in April, the bias and GE exceed the benchmark of  $\pm 0.5$  K and  
5 2 K. Nevertheless, statistical indices for January, July, and October are within the benchmark  
6 range, indicating an acceptable performance. In summary, these statistics indicate an overall  
7 satisfactory performance of meteorological predictions.

### 8 **3.2 Evaluation of fine particle (PM<sub>2.5</sub>) simulation**

9 The observational data of PM<sub>2.5</sub> and its chemical components are quite sparse and not publicly  
10 available during simulation periods (January, April, July, and October, 2012). In order to  
11 evaluate the model performance in simulating fine particles, we conduct extra simulations for  
12 a field campaign period (from July 22<sup>nd</sup> to August 23<sup>rd</sup>, 2013) and compare simulated  
13 concentrations PM<sub>2.5</sub> and its major chemical components with observations at two sites  
14 (unpublished data of Peking University and Tsinghua University), as shown in Fig. S2.  
15 Simulated PM<sub>2.5</sub> concentrations agree fairly well with observations; normalized mean biases  
16 (NMBs) are within  $\pm 12\%$  for both sites. As for chemical components, NO<sub>3</sub><sup>-</sup> concentration is  
17 overestimated (NMB = 79% to 95%), while SO<sub>4</sub><sup>2-</sup> concentration is underestimated (NMB = -  
18 52% to -57%). There is a good agreement for NH<sub>4</sub><sup>+</sup> (NMB within  $\pm 14\%$ ) and total SNA  
19 (Sulphate-nitrate-ammonium, NMB within  $\pm 15\%$ ). The overestimation of NO<sub>3</sub><sup>-</sup> and  
20 underestimation for SO<sub>4</sub><sup>2-</sup> are consistent with previous studies over East Asia, probably  
21 attributed to the lack of some chemical formation pathways in the modeling system (Wang et  
22 al., 2011; Wang et al., 2013; Gao et al., 2014). As the mass extinction coefficients for NO<sub>3</sub><sup>-</sup>,  
23 SO<sub>4</sub><sup>2-</sup>, and NH<sub>4</sub><sup>+</sup> are quite similar, overestimation in NO<sub>3</sub><sup>-</sup> and underestimation in SO<sub>4</sub><sup>2-</sup> has  
24 limited effect on simulated aerosol optical depth (AOD), which serves as input for the FLG  
25 radiative transfer scheme. Simulated elemental carbon (EC) concentrations approximately  
26 double observed EC concentrations. EC concentrations are strongly affected by local  
27 emissions, while the spatial distribution of our emission inventory may not be able to capture  
28 local emission sources surrounding observational sites, leading to model-observation bias.  
29 The overestimation may also be attributable to the absence of EC aging in CMAQ, which  
30 leads to reduced fraction of hydrophilic EC and thus reduced wet deposition. Finally,  
31 concentrations of organic carbon (OC) are underestimated due to the underestimation of

1 secondary organic aerosol (SOA) formation, which has been a common problem for widely-  
2 used chemical transport models (Carlton et al., 2010; Hallquist et al., 2009).

## 3 4 5 **References**

- 6 Carlton, A. G., Bhave, P. V., Napelenok, S. L., Edney, E. D., Sarwar, G., Pinder, R. W.,  
7 Pouliot, G. A., and Houyoux, M.: Model representation of secondary organic aerosol in  
8 cmaq4.7, *Environ Sci Technol*, 44, 8553-8560, DOI 10.1021/Es100636q, 2010.
- 9 Enhanced meteorological modeling and performance evaluation for two texas episodes.  
10 Report to the texas natural resources conservation commission[r/ol]:  
11 <http://www.tceq.state.tx.us/assets/public/implementation/air/am/contracts/reports/mm/EnhancedMetModelingAndPerformanceEvaluation.pdf>, access: 2015-03-01, 2001.
- 12  
13 Gao, Y., Zhao, C., Liu, X. H., Zhang, M. G., and Leung, L. R.: Wrf-chem simulations of  
14 aerosols and anthropogenic aerosol radiative forcing in east asia, *Atmos Environ*, 92, 250-  
15 266, DOI 10.1016/j.atmosenv.2014.04.038, 2014.
- 16 Guenther, A., Karl, T., Harley, P., Wiedinmyer, C., Palmer, P. I., and Geron, C.: Estimates of  
17 global terrestrial isoprene emissions using megan (model of emissions of gases and aerosols  
18 from nature), *Atmos Chem Phys*, 6, 3181-3210, 2006.
- 19 Hallquist, M., Wenger, J. C., Baltensperger, U., Rudich, Y., Simpson, D., Claeys, M.,  
20 Dommen, J., Donahue, N. M., George, C., Goldstein, A. H., Hamilton, J. F., Herrmann, H.,  
21 Hoffmann, T., Iinuma, Y., Jang, M., Jenkin, M. E., Jimenez, J. L., Kiendler-Scharr, A.,  
22 Maenhaut, W., McFiggans, G., Mentel, T. F., Monod, A., Prevot, A. S. H., Seinfeld, J. H.,  
23 Surratt, J. D., Szmigielski, R., and Wildt, J.: The formation, properties and impact of  
24 secondary organic aerosol: Current and emerging issues, *Atmos Chem Phys*, 9, 5155-5236,  
25 2009.
- 26 Lei, Y., Zhang, Q. A., Nielsen, C., and He, K. B.: An inventory of primary air pollutants and  
27 co(2) emissions from cement production in china, 1990-2020, *Atmos Environ*, 45, 147-154,  
28 doi: 10.1016/j.atmosenv.2010.09.034, 2011.
- 29 Pleim, J. E., and Xiu, A.: Development and testing of a surface flux and planetary boundary  
30 layer model for application in mesoscale models, *J Appl Meteorol*, 34, 16-32, 1995.
- 31 Streets, D. G., Bond, T. C., Carmichael, G. R., Fernandes, S. D., Fu, Q., He, D., Klimont, Z.,  
32 Nelson, S. M., Tsai, N. Y., Wang, M. Q., Woo, J. H., and Yarber, K. F.: An inventory of  
33 gaseous and primary aerosol emissions in asia in the year 2000, *J Geophys Res-Atmos*, 108,  
34 D21, doi: 10.1029/2002jd003093, 2003.
- 35 Wang, S. X., Xing, J., Chatani, S., Hao, J. M., Klimont, Z., Cofala, J., and Amann, M.:  
36 Verification of anthropogenic emissions of china by satellite and ground observations,  
37 *Atmos Environ*, 45, 6347-6358, DOI 10.1016/j.atmosenv.2011.08.054, 2011.
- 38 Wang, S. X., Zhao, B., Cai, S. Y., Klimont, Z., Nielsen, C. P., Morikawa, T., Woo, J. H., Kim,  
39 Y., Fu, X., Xu, J. Y., Hao, J. M., and He, K. B.: Emission trends and mitigation options for  
40 air pollutants in east asia, *Atmos Chem Phys*, 14, 6571-6603, DOI 10.5194/acp-14-6571-  
41 2014, 2014.
- 42 Wang, Y., Zhang, Q. Q., He, K., Zhang, Q., and Chai, L.: Sulfate-nitrate-ammonium aerosols  
43 over china: Response to 2000-2015 emission changes of sulfur dioxide, nitrogen oxides,  
44 and ammonia, *Atmos Chem Phys*, 13, 2635-2652, DOI 10.5194/acp-13-2635-2013, 2013.

1 Zhao, B., Wang, S. X., Wang, J. D., Fu, J. S., Liu, T. H., Xu, J. Y., Fu, X., and Hao, J. M.:  
2 Impact of national nox and so2 control policies on particulate matter pollution in china,  
3 Atmos Environ, 77, 453-463, DOI 10.1016/j.atmosenv.2013.05.012, 2013a.  
4 Zhao, B., Wang, S. X., Liu, H., Xu, J. Y., Fu, K., Klimont, Z., Hao, J. M., He, K. B., Cofala,  
5 J., and Amann, M.: NOx emissions in china: Historical trends and future perspectives,  
6 Atmos Chem Phys, 13, 9869-9897, DOI 10.5194/acp-13-9869-2013, 2013b.  
7 Zhao, B., Wang, S. X., Xing, J., Fu, K., Fu, J. S., Jang, C., Zhu, Y., Dong, X. Y., Gao, Y., Wu,  
8 W. J., Wang, J. D., and Hao, J. M.: Assessing the nonlinear response of fine particles to  
9 precursor emissions: Development and application of an extended response surface  
10 modeling technique v1.0, Geosci Model Dev, 8, 115-128, DOI 10.5194/gmd-8-115-2015,  
11 2015.  
12 Zhao, Y., Wang, S. X., Duan, L., Lei, Y., Cao, P. F., and Hao, J. M.: Primary air pollutant  
13 emissions of coal-fired power plants in china: Current status and future prediction, Atmos  
14 Environ, 42, 8442-8452, DOI 10.1016/j.atmosenv.2008.08.021, 2008.  
15  
16

1 **Tables and figures**

2 Table S1. Comparison of surface solar flux deviations between the 3-D radiation  
 3 parameterization and the plane-parallel scheme calculated directly from 4 km grids and from  
 4 summation of 800 m grids ( $W m^{-2}$ ).

|                | 4 km                 | 800 m  | Bias<br>(800 m – 4 km) | 4 km         | 800 m  | Bias<br>(800 m – 4 km) |
|----------------|----------------------|--------|------------------------|--------------|--------|------------------------|
|                | <b>Daily average</b> |        |                        | <b>7:00</b>  |        |                        |
| 4-grid average | 0.103                | 0.100  | -0.003                 | 0.006        | 0.016  | 0.010                  |
| Grid 1         | -0.071               | -0.057 | 0.014                  | -0.329       | -0.314 | 0.015                  |
| Grid 2         | -0.018               | -0.032 | -0.014                 | 0.055        | 0.058  | 0.003                  |
| Grid 3         | 0.394                | 0.387  | -0.007                 | -0.230       | -0.218 | 0.012                  |
| Grid 4         | 0.105                | 0.103  | -0.002                 | 0.528        | 0.539  | 0.011                  |
|                | <b>12:00</b>         |        |                        | <b>17:00</b> |        |                        |
| 4-grid average | 0.502                | 0.499  | -0.003                 | -0.895       | -0.909 | -0.014                 |
| Grid 1         | 0.173                | 0.198  | 0.025                  | -0.616       | -0.627 | -0.011                 |
| Grid 2         | 0.391                | 0.368  | -0.023                 | -1.275       | -1.289 | -0.014                 |
| Grid 3         | 0.967                | 0.956  | -0.011                 | -0.451       | -0.469 | -0.018                 |
| Grid 4         | 0.476                | 0.475  | -0.001                 | -1.236       | -1.252 | -0.016                 |

5

6 Table S2. Statistical results for the comparison of simulated meteorological parameters with  
 7 NCDC observations.

|           | Wind speed ( $m s^{-1}$ ) |             |                     |          | Temperature (K) |             |                     |          | Humidity ( $g kg^{-1}$ ) |             |              |          |
|-----------|---------------------------|-------------|---------------------|----------|-----------------|-------------|---------------------|----------|--------------------------|-------------|--------------|----------|
|           | Mean<br>OBS <sup>a</sup>  | Mean<br>SIM | Bias                | GE       | Mean<br>OBS     | Mean<br>SIM | Bias                | GE       | Mean<br>OBS              | Mean<br>SIM | Bias         | GE       |
| Benchmark |                           |             | $\leq$<br>$\pm 0.5$ | $\leq 2$ |                 |             | $\leq$<br>$\pm 0.5$ | $\leq 2$ |                          |             | $\leq \pm 1$ | $\leq 2$ |
| Jan, 2012 | 2.34                      | 2.59        | 0.24                | 1.12     | 266.1           | 266.2       | 0.13                | 1.64     | 1.23                     | 1.36        | 0.13         | 0.29     |
| Apr, 2012 | 3.39                      | 3.65        | 0.27                | 1.42     | 287.4           | 286.0       | -1.37               | 2.83     | 4.62                     | 4.44        | -0.18        | 0.85     |
| Jul, 2012 | 2.32                      | 2.51        | 0.20                | 1.08     | 298.0           | 297.8       | -0.22               | 1.72     | 14.80                    | 14.56       | -0.23        | 1.53     |
| Oct, 2012 | 2.38                      | 2.69        | 0.32                | 1.19     | 285.0           | 285.6       | 0.61                | 1.52     | 4.87                     | 4.54        | -0.34        | 0.80     |

8

9

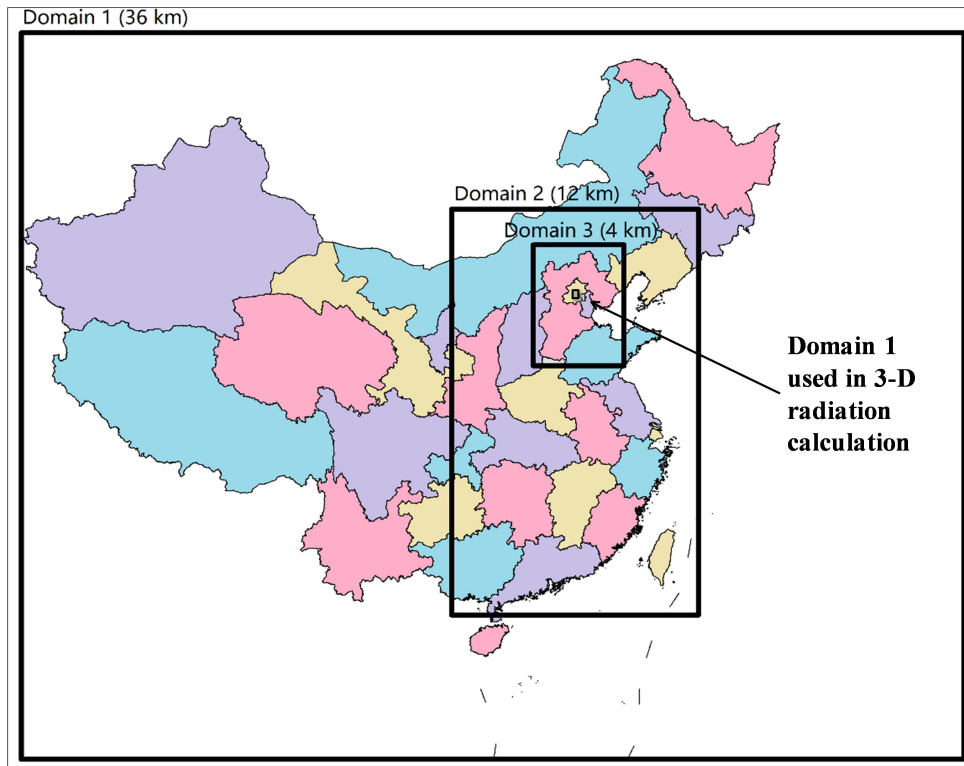

1

2 Figure S1. Triple nesting domains used in WRF/CMAQ simulation and illustration of  
 3 Domain 1 used in 3-D radiative transfer calculation (defined in Fig. 1) against WRF/CMAQ  
 4 domains. The colours represent different provinces/regions.

5



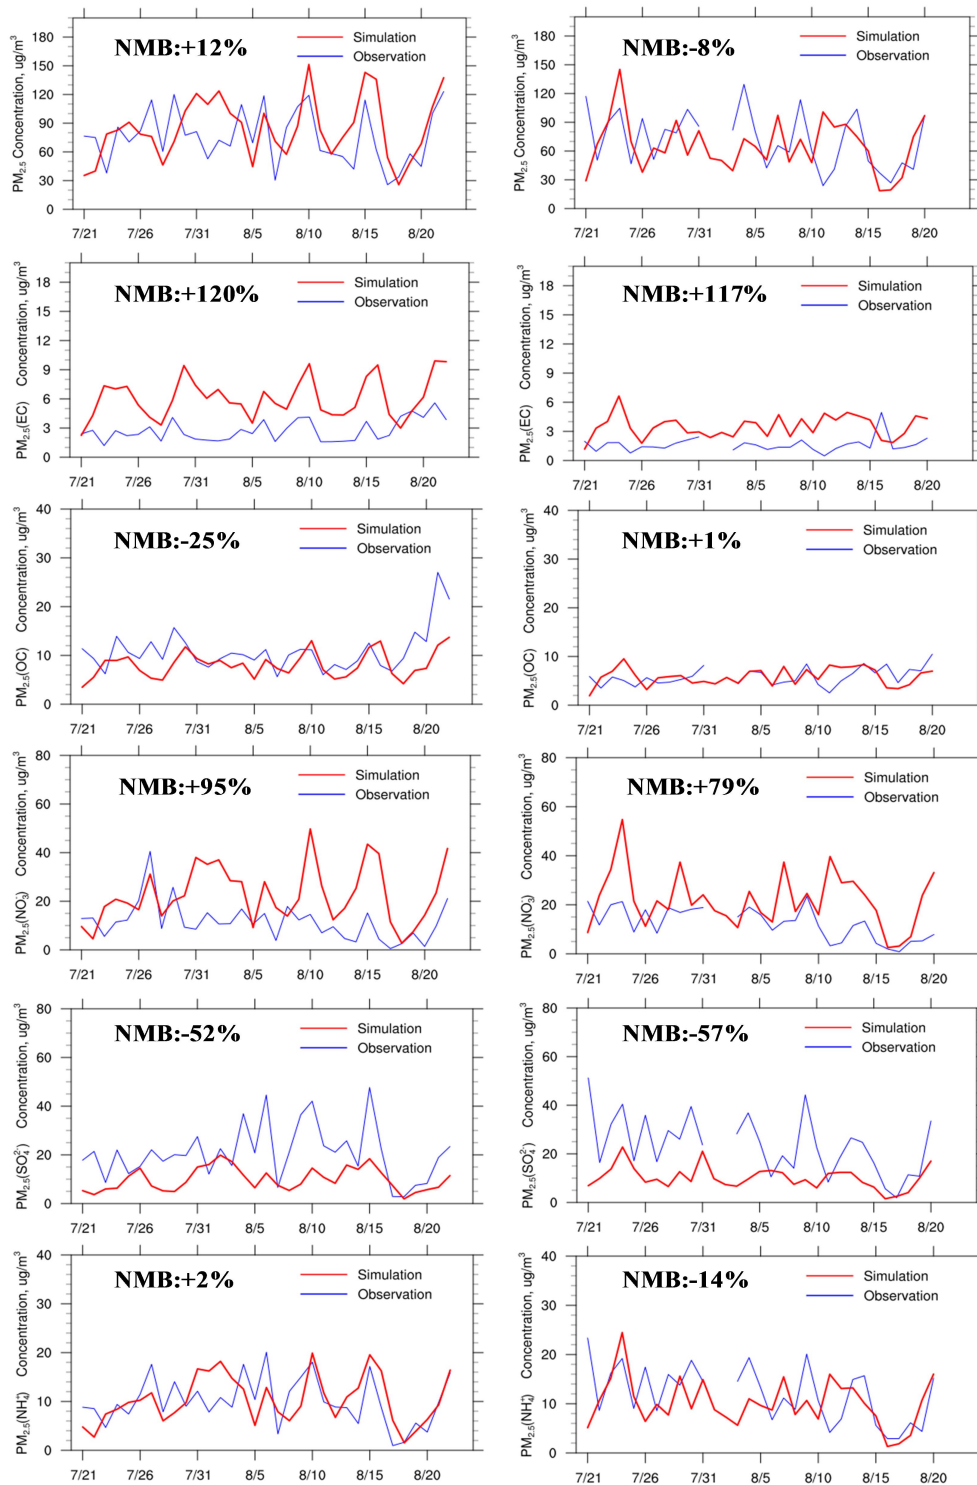

1

2 Figure S2. Comparison of simulated and observed concentrations of PM<sub>2.5</sub> and its major  
 3 chemical components at the Xiong County site (left) and the Ling County site (right). The  
 4 panels show model-observation comparison of total PM<sub>2.5</sub>, EC, OC, NO<sub>3</sub><sup>-</sup>, SO<sub>4</sub><sup>2-</sup>, and NH<sub>4</sub><sup>+</sup>  
 5 from top to bottom.

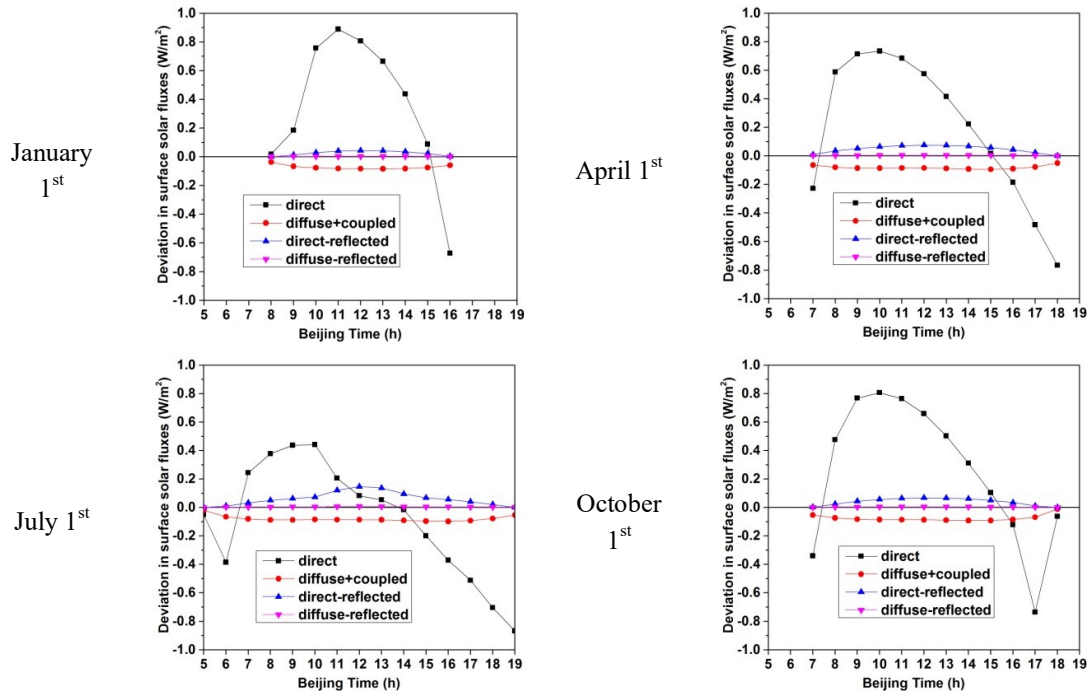

1 Figure S3. Contributions of individual components to surface solar flux deviations between  
 2 the 3-D radiation parameterization and the plane-parallel scheme in clear-sky condition  
 3 without aerosols in a typical urban area in Domain 1 (defined as Rectangle B in Fig. 1).
